# Supplementary material for: Three-wavelength exciting up-conversion luminescence and various optical temperature sensing of a novel Er3+, Yb3+, Ho3+ doped (Gd,Y,Lu)2O2S phosphor
Source: Royal Society of Chemistry journal article supplement (doi:10.1039/d4ce00130c), 2024-01-01
Supplement: d4ce00130c1.pdf [file d4ce00130c1.pdf]

## Supplemental materials

**Table S1**

Rietveld refinement results of the  $\text{Gd}_{1.559}\text{Y}_{0.03}\text{Lu}_{0.02}\text{Er}_{0.13}\text{Yb}_{0.26}\text{Ho}_{0.001}\text{O}_2\text{S}$  phosphor.

| Formula            | $\text{Gd}_{1.559}\text{Y}_{0.03}\text{Lu}_{0.02}\text{Er}_{0.13}\text{Yb}_{0.26}\text{Ho}_{0.001}\text{O}_2\text{S}$ |
|--------------------|-----------------------------------------------------------------------------------------------------------------------|
| 2 $\theta$ range   | 10°–80°                                                                                                               |
| Crystal system     | Hexagonal                                                                                                             |
| Space group; Z     | P3m1(164); 1                                                                                                          |
| Lattice parameters | a = b = 3.829 Å                                                                                                       |
|                    | c = 6.636 Å                                                                                                           |
|                    | $\alpha = \beta = 90^\circ$                                                                                           |
| Volume             | $\Gamma = 120^\circ$                                                                                                  |
|                    | V = 84.26 Å <sup>3</sup>                                                                                              |
|                    | R <sub>p</sub>                                                                                                        |
| R <sub>wp</sub>    | 16.47%                                                                                                                |
| $\chi^2$           | 1.662                                                                                                                 |

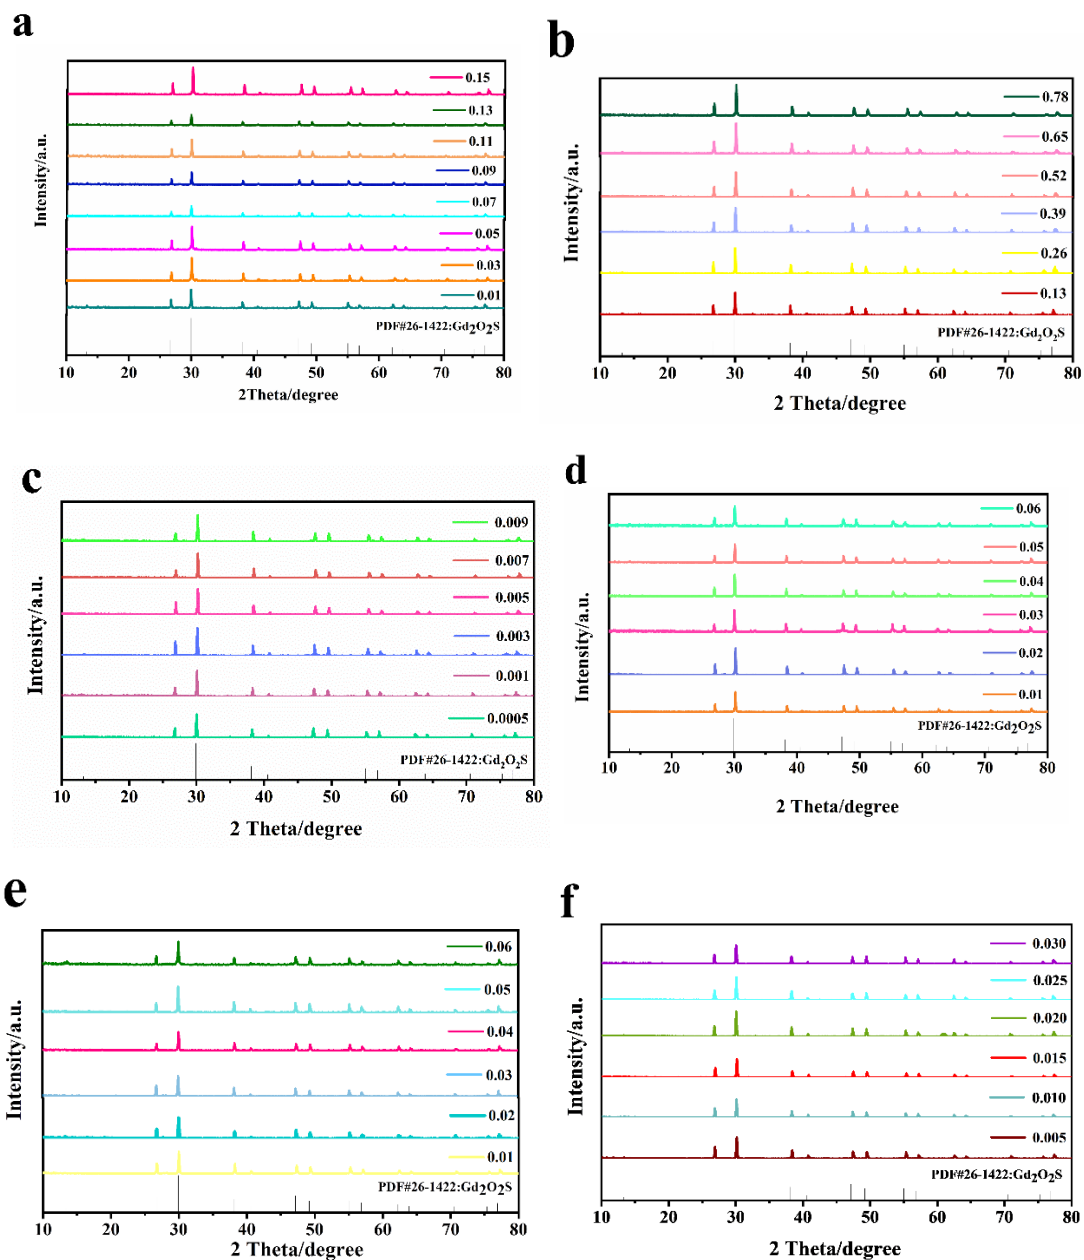

**Fig. S1** XRD of  $Gd_{2-x}Er_xO_2S$  ( $x = 0.01, 0.03, 0.05, 0.07, 0.09, 0.11, 0.13, 0.15$ ) phosphors (a);  $Gd_{1.87-x}Er_{0.13}Yb_xO_2S$  ( $x = 0.13, 0.26, 0.39, 0.52, 0.65, 0.78$ ) phosphors (b);  $Gd_{1.61-x}Er_{0.13}Yb_{0.26}Ho_xO_2S$  ( $x = 0.0005, 0.001, 0.003, 0.005, 0.007, 0.009$ ) phosphors (c);  $Gd_{1.609-x}Lu_xEr_{0.13}Yb_{0.26}Ho_{0.001}O_2S$  ( $x = 0.01, 0.02, 0.03, 0.04, 0.05, 0.06$ ) phosphors (d);  $Gd_{1.609-x}Y_xEr_{0.13}Yb_{0.26}Ho_{0.001}O_2S$  ( $x = 0.01, 0.02, 0.03, 0.04, 0.05, 0.06$ ) phosphors (e);  $Gd_{1.579-x}Y_{0.03}Lu_xEr_{0.13}Yb_{0.26}Ho_{0.001}O_2S$  ( $x = 0.005, 0.010, 0.015, 0.020, 0.025, 0.030$ ) phosphors (f)
